# Supplementary material for: Assessing the Knowledge of HPV-Associated Oropharyngeal Squamous Cell Carcinoma, HPV Vaccination, and Practice Scope among Saudi Dental Students in the Western Region
Source: MDPI journal article supplement (doi:10.3390/healthcare12090905), 2024-04-26
Supplement: s1 [file s1]

**Table S1** (Appendix): Characteristics of study's participants and their awareness of Human papillomavirus (HPV) infection (N=668)

| Demographics                            |              | HPV infection awareness<br>n (%) * |            | P-value |
|-----------------------------------------|--------------|------------------------------------|------------|---------|
|                                         |              | Yes                                | No         |         |
| Total                                   |              | 453(67.8%)                         | 215(32.2%) | -       |
| Age (years)                             | < 20         | 25(3.7%)                           | 59(8.8%)   | 0.001*  |
|                                         | 20-25        | 364(54.5%)                         | 141(21%)   |         |
|                                         | 26-30        | 64(9.4%)                           | 15(2.3%)   |         |
| Gender                                  | Male         | 198<br>(29.6%)                     | 93(14%)    | .912    |
|                                         | Female       | 255<br>(38.2%)                     | 122(18%)   |         |
| Dental College                          | Private      | 160 (24%)                          | 74(11%)    | .82     |
|                                         | Governmental | 293 (44%)                          | 141(21%)   |         |
| Academic level                          | Clinical     | 353 (53%)                          | 60(9%)     | 0.001*  |
|                                         | Non-Clinical | 100 (15%)                          | 155(23%)   |         |
| GPA (out of 5)                          | ≤ 2.99       | 8 (1.2%)                           | 11(1.6%)   | .152    |
|                                         | 3-3.49       | 46 (6.6%)                          | 25(4%)     |         |
|                                         | 3.50-3.99    | 81 (12%)                           | 36(5.4%)   |         |
|                                         | 4-4.49       | 155(23%)                           | 66(10%)    |         |
|                                         | ≥4.50        | 163(24.2%)                         | 77(12%)    |         |
| Marital status                          | Single       | 425(64%)                           | 204(31%)   | .583    |
|                                         | Married      | 28(4%)                             | 11(2%)     |         |
| History of sexually transmitted disease | Yes          | 17(2.5%)                           | 7(1.5%)    | .75     |
|                                         | No           | 436(65%)                           | 208(31%)   |         |
| Smoking status                          | Yes          | 127(19%)                           | 41(6%)     | .013*   |
|                                         | No           | 326(49%)                           | 174(26%)   |         |

Chi-square test, Significant at p<0.05

**Table S2** (Appendix): Reliability and dependability of study main domains (HPV knowledge and HPV Scope of Practice)

| Reliability Statistics | Cronbach's Alpha | N of Items |
|------------------------|------------------|------------|
| HPV knowledge          | 0.651            | 10         |
| HPV scope of practice  | 0.797            | 4          |

**Figure S1** (appendix)

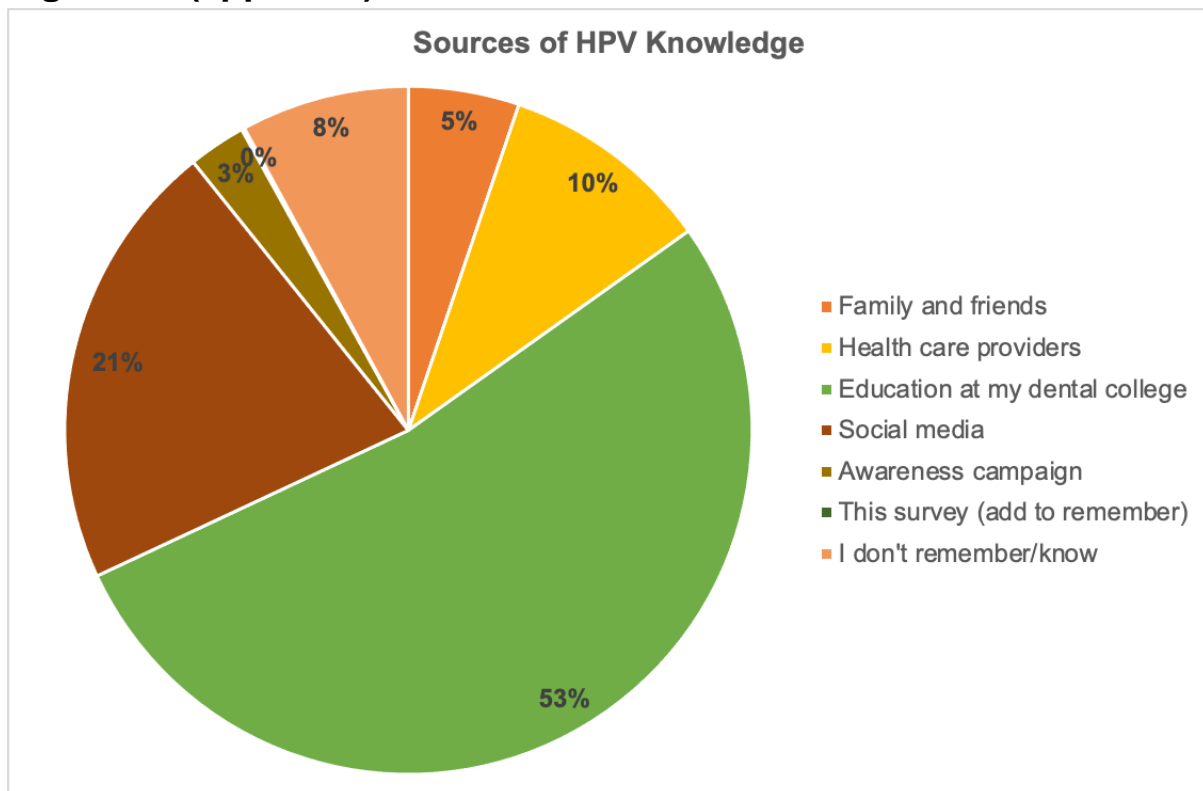

**Figure S1.** Sources of knowledge about the HPV

**Table S3** (Appendix): HPV vaccine knowledge assessment.

|                                                                |     | <b>N</b> | <b>%</b> |
|----------------------------------------------------------------|-----|----------|----------|
| Total                                                          |     | 453      | 100.0    |
| Have you ever heard of the human papillomavirus (HPV) vaccine? | Yes | 257      | 56.7     |
|                                                                | No  | 196      | 43.3     |
| <b>Variables</b>                                               |     | <b>N</b> | <b>%</b> |
| Total                                                          |     | 257      | 100.0    |
| Do you know the adequate age to get the vaccine?               | Yes | 93       | 36.2     |
|                                                                | No  | 164      | 63.8     |
| Are you vaccinated against HPV?                                | Yes | 60       | 23.3     |
|                                                                | No  | 197      | 76.7     |

**Table S4** (Appendix): HPV Scope of Practice scores assessment

| <b>HPV scope of practice</b>                                                                                                              | <b>N</b> | <b>Min</b> | <b>Max</b> | <b>Mean</b> | <b>SD</b> |
|-------------------------------------------------------------------------------------------------------------------------------------------|----------|------------|------------|-------------|-----------|
| Discussing the link between HPV and oropharyngeal cancer with the patients falls within the scope and role of the dental professional     | 257      | 0.00       | 4.00       | 3.09        | 0.9       |
| Recommending HPV vaccination with the patients falls within the scope and role of the dental professional                                 | 257      | 0.00       | 4.00       | 2.95        | 1.0       |
| Attending continuing educational courses about HPV role in OPSCC falls within the scope and role of the dental professional               | 257      | 0.00       | 4.00       | 3.11        | 0.9       |
| Planning public awareness campaigns about HPV infection, vaccination and OPSCC falls within the scope and role of the dental professional | 257      | 0.00       | 4.00       | 3.01        | 1.0       |
